# Supplementary material for: Thymoquinone synergizes gemcitabine anti-breast cancer activity via modulating its apoptotic and autophagic activities
Source: PubMed Central journal article supplement (PMC6076303; doi:10.1038/s41598-018-30046-z), 2018-08-03
Supplement: 41598_2018_30046_MOESM1_ESM.pdf [file 41598_2018_30046_MOESM1_ESM.pdf]

**Thymoquinone synergizes gemcitabine anti-breast cancer activity via modulating its apoptotic and autophagic activities**

Hanan A. Bashmail<sup>1</sup>, Aliaa A. Alamoudi<sup>1,2</sup>, Abdulwahab Noorwali<sup>1,2</sup>, Gehan A. Hegazy<sup>1,3</sup>, Ghada AJabnoor<sup>1</sup>, Hani Choudhry<sup>4</sup>, Ahmed M. Al-Abd<sup>5,6,7,\*</sup>

<sup>1</sup>Departement of Clinical Biochemistry, Faculty of Medicine, King Abdulaziz University, Jeddah, Saudi Arabia

<sup>2</sup>Stem Cell Research Unit, King Fahad Medical Research Center, Jeddah, Saudi Arabia

<sup>3</sup>Department of Hormones, Medical Division, National Research Centre, Giza, Egypt

<sup>4</sup>Department of Biochemistry, Faculty of Science, King Abdulaziz University, Jeddah, Saudi Arabia

<sup>5</sup>Department of Pharmacology, Medical Division, National Research Centre, Giza, Egypt

<sup>6</sup>Biomedical Research Section, Nawah Scientific, Mokkatam, Cairo, Egypt

<sup>7</sup>Depaertment of Pharmaceutical Sciences, College of Pharmacy, Gulf Medical University, Ajman, United Arab Emirates

**\*Corresponding authors:**

**Ahmed M. Al-Abd**, Department of Pharmacology, Medical Division, National Research Centre, Giza, Egypt

**Tel:** +966-(0)2-640-0000/Ext 21125

**Fax:** +966-(0)2-695-1696

**E-mail:** [ahmedmalabd@pharma.asu.edu.eg](mailto:ahmedmalabd@pharma.asu.edu.eg)

**Supp. Table 1.** The effect of TQ, GCB and their combination on cell cycle distribution of MCF-7 cell line after 24 h treatment

| <b>Phase</b>   | <b>Control</b> | <b>TQ</b> | <b>GCB</b> | <b>GCB+TQ</b> |
|----------------|----------------|-----------|------------|---------------|
| <b>Go / G1</b> | 38.1±3.0%      | 63.9±0.7% | 67.7±1.2%  | 62.1±1.0%     |
| <b>S</b>       | 44.5±2.5%      | 44.4±0.3% | 24.6±1.5%  | 23.3±0.7%     |
| <b>G2 / M</b>  | 17.5±2.3%      | 18.7±0.3% | 7.6±0.9%   | 14.5±1.0%     |
| <b>Pre-G</b>   | 4.7±1.5%       | 3.3±0.2%  | 8.8±0.6%   | 7.2±1.2%      |

**Supp. Table 2.** The effect of TQ, GCB and their combination on cell cycle distribution of MCF-7 cell line after 48 h treatment

| <b>Phase</b>                         | <b>Control</b> | <b>TQ</b> | <b>GCB</b> | <b>GCB+TQ</b> |
|--------------------------------------|----------------|-----------|------------|---------------|
| <b>G<sub>0</sub> / G<sub>1</sub></b> | 46.1±3.9%      | 43.2±6.9% | 26.4±3.6%  | 22.4±2.2%     |
| <b>S</b>                             | 38.0±1.9%      | 40.4±2.9% | 50.4±3.2%  | 48.2±4.7%     |
| <b>G<sub>2</sub> / M</b>             | 15.9±2.0%      | 16.4±3.9% | 23.2±3.0%  | 29.4±3.0%     |
| <b>Pre-G</b>                         | 2.5±0.6%       | 2.5±0.6%  | 23.1±3.4%  | 49.3±4.2%     |

**Supp. Table 3.** The effect of TQ, GCB and their combination on cell cycle distribution of T47D cell line after 24 h treatment

| <b>Phase</b>                         | <b>Control</b> | <b>TQ</b> | <b>GCB</b> | <b>GCB+TQ</b> |
|--------------------------------------|----------------|-----------|------------|---------------|
| <b>G<sub>0</sub> / G<sub>1</sub></b> | 53.2±0.6%      | 47.7±3.5% | 60.5±1.8%  | 58.9±3.9%     |
| <b>S</b>                             | 27.5±1.9%      | 32.4±4.1% | 27.3±1.7%  | 33.1±4.6%     |
| <b>G<sub>2</sub> / M</b>             | 19.4±1.7%      | 19.9±2.2% | 12.2±0.6%  | 8.0±1.5%      |
| <b>Pre-G</b>                         | 8.5±0.3%       | 10.8±0.2% | 28.9±0.9%  | 57.1±4.4%     |

**Supp. Table 4.** The effect of TQ, GCB and their combination on cell cycle distribution of T47D cell line after 24 h treatment

| <b>Phase</b>   | <b>Control</b> | <b>TQ</b> | <b>GCB</b> | <b>GCB+TQ</b> |
|----------------|----------------|-----------|------------|---------------|
| <b>Go / G1</b> | 54.3±2.7%      | 52.7±1.4% | 36.5±3.4%  | 32.1±3.3%     |
| <b>S</b>       | 29.1±1.7%      | 38.4±0.2% | 44.3±2.5%  | 49.9±1.3%     |
| <b>G2 / M</b>  | 16.6±1.0%      | 8.8±1.2%  | 19.2±1.7%  | 18.1±3.6%     |
| <b>Pre-G</b>   | 12.6±1.4%      | 67.6±5.2% | 15.1±1.1%  | 64.5±1.0%     |
